# Supplementary material for: A mechanism for epigenetic control of DNA replication
Source: PubMed Central journal article supplement — Genes Dev. 2018 Feb 1;32(3-4):224–9. doi: 10.1101/gad.306464.117 (PMC5859964; doi:10.1101/gad.306464.117), 2018-02-01
Supplement: supp_gad.306464.117_Supplemental_Figure_S2.pdf [file supp_gad.306464.117_Supplemental_Figure_S2.pdf]

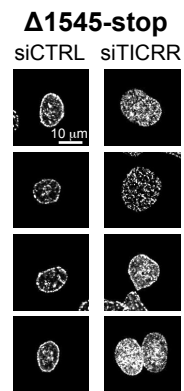

**Fig. S2. The TICRR kd-Δ1545-Stop rescue cells display abnormal mid-S-phase spatial patterns of DNA replication.** Representative EdU-labeled nuclei from cells expressing the Δ1545 transgene following siCtrl or siTICRR. Mid S-phase cells were identified by the presence of peripheral EdU labeling.
