# Supplementary material for: A mechanism for epigenetic control of DNA replication
Source: PubMed Central journal article supplement — Genes Dev. 2018 Feb 1;32(3-4):224–9. doi: 10.1101/gad.306464.117 (PMC5859964; doi:10.1101/gad.306464.117), 2018-02-01
Supplement: supp_gad.306464.117_Supplemental_Figure_S4.pdf [file supp_gad.306464.117_Supplemental_Figure_S4.pdf]

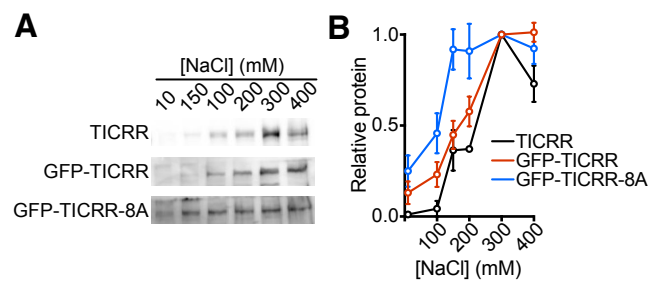

**Fig. S4. The TICRR-8A mutant is extracted from nuclei at lower salt concentrations than wild-type TICRR.** (A) Immunoblots showing the amounts of endogenous TICRR, EGFP-TICRR, or EGFP-TICRR-8A that was extracted from U2OS nuclei using the indicated NaCl concentrations. (B) Quantification of (A) with triplicate experiments. Mean  $\pm$  SD is shown.
