# Supplementary material for: A mechanism for epigenetic control of DNA replication
Source: PubMed Central journal article supplement — Genes Dev. 2018 Feb 1;32(3-4):224–9. doi: 10.1101/gad.306464.117 (PMC5859964; doi:10.1101/gad.306464.117), 2018-02-01
Supplement: supp_gad.306464.117_Supplemental_Figure_S5.pdf [file supp_gad.306464.117_Supplemental_Figure_S5.pdf]

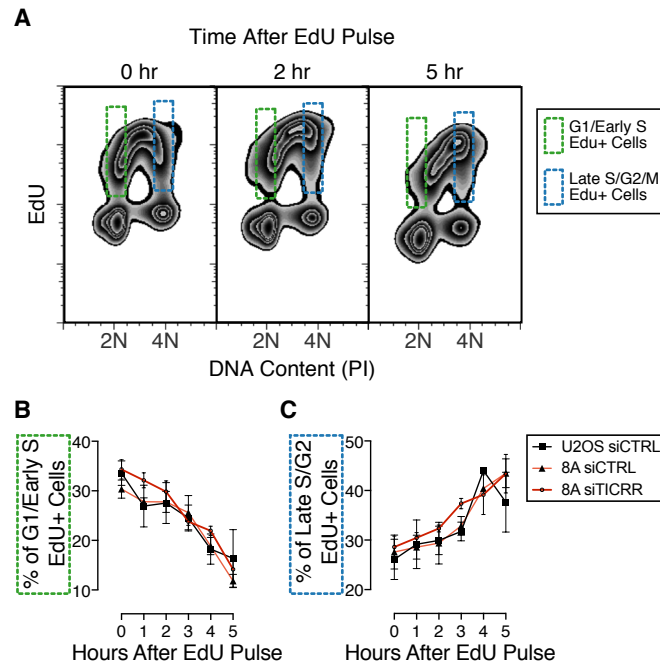

**Fig. S5. The TICRR-BRD2/4 interaction is not required for DNA synthesis.** (A) Representative examples EdU versus PI FACS plots from U2OS cells pulse labeled with EdU and then incubated for 0 to 5 hours before preparing for FACS. We evaluated the DNA content of EdU+ cells by FACS and quantified the percent of EdU+ cells falling within narrow DNA content gates representing G1/Early-S cells (green dashed box; with 2N DNA) or Late-S/G2 cells (blue dashed box; with 4N DNA). (B) Quantitation of the percentage of EdU positive cells in the G1/early S gate during the 5 hours following the EdU pulse label. (C) Quantitation of the percentage of EdU positive cells in the late-S/G2/M gate during the 5 hours following the EdU pulse.
