# Supplementary material for: A mechanism for epigenetic control of DNA replication
Source: PubMed Central journal article supplement — Genes Dev. 2018 Feb 1;32(3-4):224–9. doi: 10.1101/gad.306464.117 (PMC5859964; doi:10.1101/gad.306464.117), 2018-02-01
Supplement: supp_gad.306464.117_Supplemental_Figure_S7.pdf [file supp_gad.306464.117_Supplemental_Figure_S7.pdf]

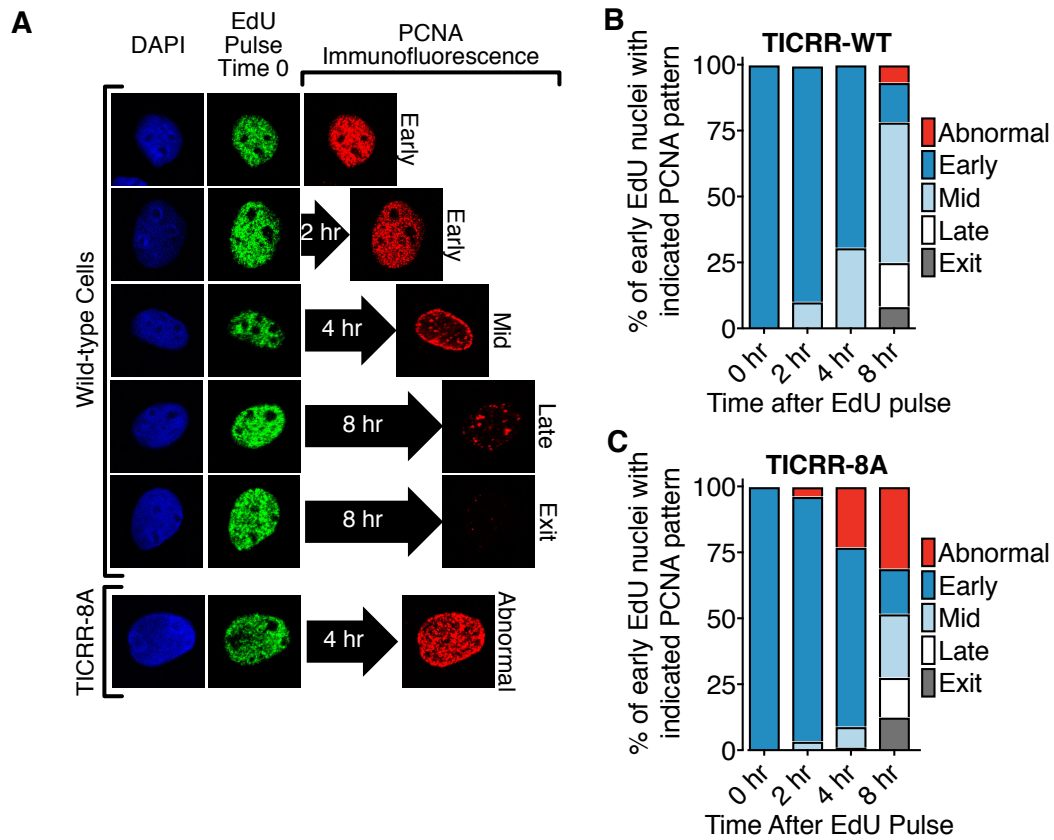

**Fig. S7. Abnormal patterns represent the start of mid S-phase replication before early replication is completed.** (A) Schematic describing how changes in replication patterns were assessed. Replication sites were EdU-labeled at time zero, then cells were fixed and labeled with anti-PCNA at 0, 2, 4, or 8 hours. Percentages of cells expressing the wild-type TICRR (B) or TICRR-8A (C) transgenes that had the early EdU pattern at time zero and the indicated PCNA patterns at times 0, 2, 4, or 8 hours (bars represent means of pattern percentages for two independent experiments in which at least 100 EdU-positive cells were scored).
