# Supplementary material for: A mechanism for epigenetic control of DNA replication
Source: PubMed Central journal article supplement — Genes Dev. 2018 Feb 1;32(3-4):224–9. doi: 10.1101/gad.306464.117 (PMC5859964; doi:10.1101/gad.306464.117), 2018-02-01
Supplement: supp_gad.306464.117_Supplemental_Figure_S8.pdf [file supp_gad.306464.117_Supplemental_Figure_S8.pdf]

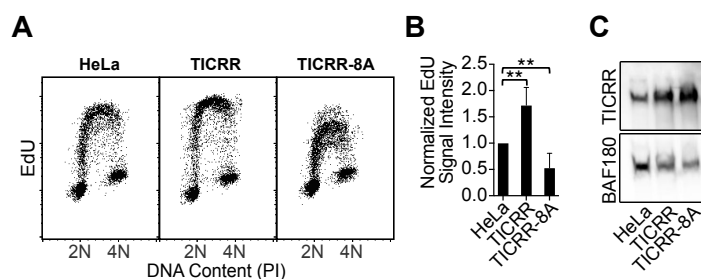

**Fig. S8. Overexpression of the TICRR-8A mutant inhibits DNA Synthesis in HeLa cells.** **(A)** EdU incorporation and DNA content were measured by flow cytometry in HeLa parental cells and in cells expressing the EGFP-2A-TICRR or EGFP-2A-TICRR-8A transgene. **(B)** Quantification of replicate data from (A). EdU signal intensity was normalized to that of HeLa cells (mean  $\pm$  s.d. \*\*  $P=.002$  for HeLa vs. EGFP-2A-TICRR, unpaired t-test; \*\* $P=.005$  for HeLa vs. EGFP-2A-TICRR-8A, unpaired t-test). **(C)** Immunoblotting for nuclear TICRR protein or a loading control (BAF180) in parental HeLa cells or HeLa cells overexpressing wildtype TICRR or the TICRR-8A mutant.
